# Supplementary material for: Evaluation of antithrombotic use and COVID-19 outcomes in a nationwide atrial fibrillation cohort
Source: HighWire-hosted journal article supplement (doi:10.1136/heartjnl-2021-320325), 2022-03-10
Supplement: heartjnl-2021-320325supp001_data_supplement.pdf [file heartjnl-2021-320325supp001_data_supplement.pdf]

# Evaluation of antithrombotic use and COVID-19 outcomes in a nationwide atrial fibrillation cohort

## SUPPLEMENTARY MATERIAL

### SUPPLEMENTARY TABLES

**Supplementary Table 1 - study population demographic characteristics for individuals with COVID-19 event by antithrombotic medication category**

Percentages should be interpreted vertically for all variables e.g. proportion within category for variable, except for the first row showing percentage of individuals across AT medication categories.

|                          | Total            | Any AT           | AC only          | AP only          | AC and AP       | No AT            |
|--------------------------|------------------|------------------|------------------|------------------|-----------------|------------------|
| Individuals              | 77364<br>(100%)  | 67087<br>(86.7%) | 54756<br>(70.8%) | 6743<br>(8.7%)   | 5588<br>(7.2%)  | 10277<br>(13.3%) |
| Age (mean years, +/- sd) | 81 (+/-<br>10.1) | 81 (+/-<br>9.8)  | 81 (+/-<br>9.7)  | 82 (+/-<br>10.6) | 79 (+/-<br>9.7) | 81 (+/-<br>12)   |
| 65-74                    | 12928<br>(16.7%) | 11331<br>(16.9%) | 9123<br>(16.7%)  | 1014<br>(15%)    | 1194<br>(21.4%) | 1597<br>(15.5%)  |
| >=75                     | 59369<br>(76.7%) | 51579<br>(76.9%) | 42348<br>(77.3%) | 5289<br>(78.4%)  | 3942<br>(70.5%) | 7790<br>(75.8%)  |
| Female                   | 37227<br>(48.1%) | 31498<br>(47%)   | 26569<br>(48.5%) | 2992<br>(44.4%)  | 1937<br>(34.7%) | 5729<br>(55.7%)  |
| Ethnicity                |                  |                  |                  |                  |                 |                  |
| White                    | 72745<br>(94%)   | 63132<br>(94.1%) | 51899<br>(94.8%) | 6162<br>(91.4%)  | 5071<br>(90.7%) | 9613<br>(93.5%)  |
| Asian or Asian British   | 2666<br>(3.4%)   | 2311<br>(3.4%)   | 1578<br>(2.9%)   | 389<br>(5.8%)    | 344<br>(6.2%)   | 355<br>(3.5%)    |
| Black or Black British   | 1010<br>(1.3%)   | 844<br>(1.3%)    | 645<br>(1.2%)    | 118<br>(1.7%)    | 81<br>(1.4%)    | 166<br>(1.6%)    |
| Mixed                    | 281<br>(0.4%)    | 238<br>(0.4%)    | 187<br>(0.3%)    | 24<br>(0.4%)     | 27<br>(0.5%)    | 43 (0.4%)        |
| Other Ethnic Groups      | 662<br>(0.9%)    | 562<br>(0.8%)    | 447<br>(0.8%)    | 50<br>(0.7%)     | 65<br>(1.2%)    | 100 (1%)         |
| Geographical locations   |                  |                  |                  |                  |                 |                  |

|                          |                  |                  |                 |                 |                 |                 |
|--------------------------|------------------|------------------|-----------------|-----------------|-----------------|-----------------|
| South East               | 11387<br>(14.7%) | 9725<br>(14.5%)  | 8012<br>(14.6%) | 913<br>(13.5%)  | 800<br>(14.3%)  | 1662<br>(16.2%) |
| North West               | 12691<br>(16.4%) | 11153<br>(16.6%) | 9024<br>(16.5%) | 1113<br>(16.5%) | 1016<br>(18.2%) | 1538<br>(15%)   |
| East of England          | 7095<br>(9.2%)   | 6163<br>(9.2%)   | 5047<br>(9.2%)  | 591<br>(8.8%)   | 525<br>(9.4%)   | 932<br>(9.1%)   |
| South West               | 4185<br>(5.4%)   | 3577<br>(5.3%)   | 2911<br>(5.3%)  | 367<br>(5.4%)   | 299<br>(5.4%)   | 608<br>(5.9%)   |
| Yorkshire and The Humber | 8809<br>(11.4%)  | 7639<br>(11.4%)  | 6230<br>(11.4%) | 878<br>(13%)    | 531<br>(9.5%)   | 1170<br>(11.4%) |
| West Midlands            | 13273<br>(17.2%) | 11492<br>(17.1%) | 9423<br>(17.2%) | 1129<br>(16.7%) | 940<br>(16.8%)  | 1781<br>(17.3%) |
| East Midlands            | 7279<br>(9.4%)   | 6439<br>(9.6%)   | 5376<br>(9.8%)  | 603<br>(8.9%)   | 460<br>(8.2%)   | 840<br>(8.2%)   |
| London                   | 8806<br>(11.4%)  | 7528<br>(11.2%)  | 5929<br>(10.8%) | 802<br>(11.9%)  | 797<br>(14.3%)  | 1278<br>(12.4%) |
| North East               | 3839<br>(5%)     | 3371<br>(5%)     | 2804<br>(5.1%)  | 347<br>(5.1%)   | 220<br>(3.9%)   | 468<br>(4.6%)   |
| IMD deciles              |                  |                  |                 |                 |                 |                 |
| 1 (most deprived)        | 8396<br>(10.9%)  | 7331<br>(10.9%)  | 5843<br>(10.7%) | 832<br>(12.3%)  | 656<br>(11.7%)  | 1065<br>(10.4%) |
| 10 (least deprived)      | 6306<br>(8.2%)   | 5449<br>(8.1%)   | 4574<br>(8.4%)  | 480<br>(7.1%)   | 395<br>(7.1%)   | 857<br>(8.3%)   |

**Supplementary Table 2 - study population comorbidities that increase stroke and bleeding risk for individuals with COVID-19 event by antithrombotic medication category**

Percentages should be interpreted vertically for all variables e.g. proportion within category for variable

|                                | Total             | Any AT            | AC only           | AP only          | AC and AP        | No AT            |
|--------------------------------|-------------------|-------------------|-------------------|------------------|------------------|------------------|
| CHA2DS2-VASc score components  |                   |                   |                   |                  |                  |                  |
| Vascular disease               | 169797<br>(17.5%) | 159892<br>(18.7%) | 103946<br>(14.4%) | 23815<br>(33.8%) | 32131<br>(50.9%) | 9905<br>(8.5%)   |
| Stroke / TIA / Thromboembolism | 196899<br>(20.2%) | 183140<br>(21.4%) | 150588<br>(20.8%) | 16611<br>(23.6%) | 15941<br>(25.3%) | 13759<br>(11.8%) |
| Congestive heart failure       | 247562<br>(25.4%) | 228877<br>(26.7%) | 192023<br>(26.6%) | 15038<br>(21.3%) | 21816<br>(34.6%) | 18685<br>(16%)   |

|                                      |                   |                   |                   |                   |                  |                   |
|--------------------------------------|-------------------|-------------------|-------------------|-------------------|------------------|-------------------|
| Diabetes                             | 268437<br>(27.6%) | 242060<br>(28.3%) | 197216<br>(27.3%) | 21602<br>(30.6%)  | 23242<br>(36.8%) | 26377<br>(22.6%)  |
| Hypertension                         | 675680<br>(69.4%) | 600627<br>(70.1%) | 505516<br>(69.9%) | 49680<br>(70.5%)  | 45431<br>(72%)   | 75053<br>(64.3%)  |
| CHA2DS2-VASc score<br>(mean, +/- sd) | 3.9 (+/-<br>1.4)  | 4 (+/-<br>1.4)    | 3.9 (+/-<br>1.4)  | 4.1 (+/-<br>1.5)  | 4.4 (+/-<br>1.5) | 3.4 (+/-<br>1.3)  |
| 2                                    | 172174<br>(17.7%) | 138751<br>(16.2%) | 120968<br>(16.7%) | 10914<br>(15.5%)  | 6869<br>(10.9%)  | 33423<br>(28.7%)  |
| 3                                    | 245977<br>(25.3%) | 213057<br>(24.9%) | 184242<br>(25.5%) | 16290<br>(23.1%)  | 12525<br>(19.8%) | 32920<br>(28.2%)  |
| 4                                    | 252051<br>(25.9%) | 224259<br>(26.2%) | 190710<br>(26.4%) | 17874<br>(25.4%)  | 15675<br>(24.8%) | 27792<br>(23.8%)  |
| 5                                    | 162315<br>(16.7%) | 149102<br>(17.4%) | 122353<br>(16.9%) | 12996<br>(18.4%)  | 13753<br>(21.8%) | 13213<br>(11.3%)  |
| >=6                                  | 140457<br>(14.4%) | 131171<br>(15.3%) | 104466<br>(14.5%) | 12426<br>(17.6%)  | 14279<br>(22.6%) | 9286<br>(8%)      |
| HAS-BLED score<br>components         |                   |                   |                   |                   |                  |                   |
| Renal disease                        | 315940<br>(32.5%) | 284379<br>(33.2%) | 237965<br>(32.9%) | 24423<br>(34.6%)  | 21991<br>(34.9%) | 31561<br>(27.1%)  |
| Liver disease                        | 8462<br>(0.9%)    | 6707<br>(0.8%)    | 5440<br>(0.8%)    | 788<br>(1.1%)     | 479<br>(0.8%)    | 1755<br>(1.5%)    |
| Stroke                               | 196493<br>(20.2%) | 182756<br>(21.3%) | 150232<br>(20.8%) | 16606<br>(23.6%)  | 15918<br>(25.2%) | 13737<br>(11.8%)  |
| Major bleeding event                 | 335289<br>(34.5%) | 293096<br>(34.2%) | 240703<br>(33.3%) | 27431<br>(38.9%)  | 24962<br>(39.6%) | 42193<br>(36.2%)  |
| Harmful alcohol use                  | 28969<br>(3%)     | 25571<br>(3%)     | 21161<br>(2.9%)   | 2274<br>(3.2%)    | 2136<br>(3.4%)   | 3398<br>(2.9%)    |
| Uncontrolled<br>hypertension         | 66576<br>(6.8%)   | 58873<br>(6.9%)   | 48444<br>(6.7%)   | 5395<br>(7.7%)    | 5034<br>(8%)     | 7703<br>(6.6%)    |
| History of fall                      | 119738<br>(12.3%) | 103615<br>(12.1%) | 85718<br>(11.9%)  | 10717<br>(15.2%)  | 7180<br>(11.4%)  | 16123<br>(13.8%)  |
| BMI (mean, +/-<br>sd)                | 28.7 (+/-<br>6)   | 28.8 (+/-<br>6)   | 28.8 (+/-<br>6.1) | 28.1 (+/-<br>5.6) | 29 (+/-<br>5.8)  | 27.9 (+/-<br>5.9) |
| Smoking status (ever<br>smoker)      | 638774<br>(65.7%) | 566861<br>(66.2%) | 472208<br>(65.3%) | 48568<br>(68.9%)  | 46085<br>(73%)   | 71913<br>(61.7%)  |

**Supplementary Table 3 – study population characteristics for COVID-19 outcomes and other medications for individuals with COVID-19 event by antithrombotic medication category**

Percentages should be interpreted vertically for all variables e.g. proportion within category for variable

|                                              | Total             | Any AT            | AC only           | AP only          | AC and AP        | No AT            |
|----------------------------------------------|-------------------|-------------------|-------------------|------------------|------------------|------------------|
| COVID-19 outcomes                            |                   |                   |                   |                  |                  |                  |
| COVID-19 event                               | 77364<br>(8%)     | 67087<br>(7.8%)   | 54756<br>(7.6%)   | 6743<br>(9.6%)   | 5588<br>(8.9%)   | 10277<br>(8.8%)  |
| COVID-19 hospitalisation                     | 37418<br>(3.8%)   | 33150<br>(3.9%)   | 26887<br>(3.7%)   | 3201<br>(4.5%)   | 3062<br>(4.9%)   | 4268<br>(3.7%)   |
| COVID-19 hospitalisation (primary diagnosis) | 27011<br>(2.8%)   | 23919<br>(2.8%)   | 19375<br>(2.7%)   | 2319<br>(3.3%)   | 2225<br>(3.5%)   | 3092<br>(2.7%)   |
| COVID-19 death                               | 21116<br>(2.2%)   | 18173<br>(2.1%)   | 14553<br>(2%)     | 2055<br>(2.9%)   | 1565<br>(2.5%)   | 2943<br>(2.5%)   |
| COVID-19 death (primary diagnosis)           | 15297<br>(1.6%)   | 13158<br>(1.5%)   | 10522<br>(1.5%)   | 1508<br>(2.1%)   | 1128<br>(1.8%)   | 2139<br>(1.8%)   |
| Other medications                            |                   |                   |                   |                  |                  |                  |
| Antihypertensives                            | 540681<br>(55.6%) | 498116<br>(58.2%) | 412078<br>(57%)   | 40377<br>(57.3%) | 45661<br>(72.4%) | 42565<br>(36.5%) |
| Lipid regulating drugs                       | 589570<br>(60.6%) | 547522<br>(63.9%) | 441737<br>(61.1%) | 51120<br>(72.5%) | 54665<br>(86.6%) | 42048<br>(36.1%) |
| Proton pump inhibitors                       | 409430<br>(42.1%) | 369462<br>(43.1%) | 286984<br>(39.7%) | 39181<br>(55.6%) | 43297<br>(68.6%) | 39968<br>(34.3%) |
| NSAIDS                                       | 19448<br>(2%)     | 14608<br>(1.7%)   | 11101<br>(1.5%)   | 2317<br>(3.3%)   | 1190<br>(1.9%)   | 4840<br>(4.1%)   |
| Corticosteroids                              | 80347<br>(8.3%)   | 71706<br>(8.4%)   | 59511<br>(8.2%)   | 5929<br>(8.4%)   | 6266<br>(9.9%)   | 8641<br>(7.4%)   |
| Other immunosuppressants                     | 13216<br>(1.4%)   | 11690<br>(1.4%)   | 9498<br>(1.3%)    | 1152<br>(1.6%)   | 1040<br>(1.6%)   | 1526<br>(1.3%)   |
| COVID-19 vaccine prior to COVID-19 event     | 9463<br>(1%)      | 8248<br>(1%)      | 6799<br>(0.9%)    | 824<br>(1.2%)    | 625 (1%)         | 1215<br>(1%)     |

## SUPPLEMENTARY FIGURES

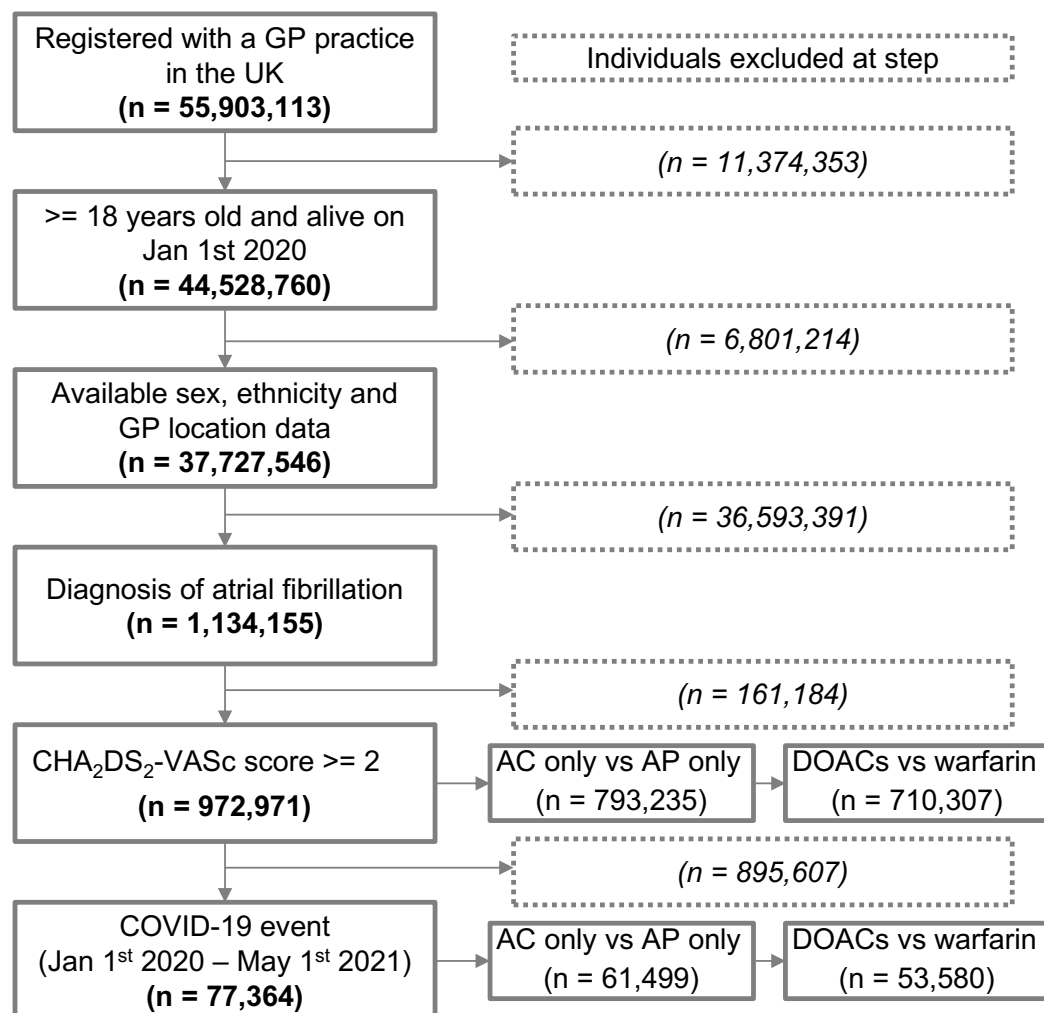

**Supplementary Figure 1: Study flowchart showing the number of individuals excluded at each step and the study population sizes for each question**

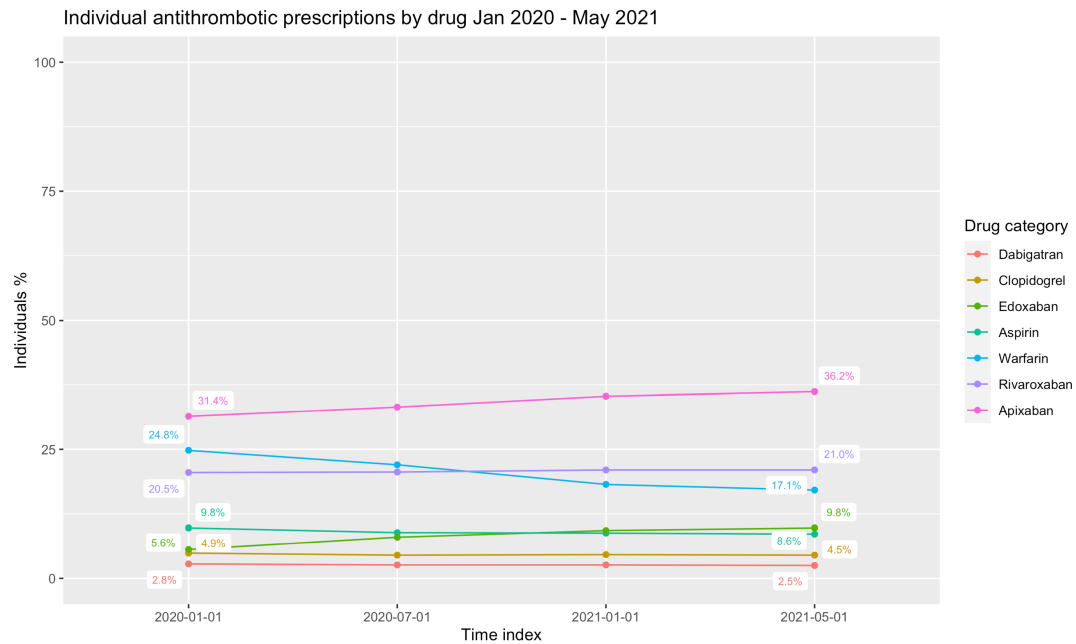

**Supplementary Figure 2: Individual antithrombotic prescriptions by drug January 2020 – May 2021**

Ordered by proportion of prescriptions with non-mutually exclusive categories e.g. an individual may have prescriptions for multiple drugs (warfarin and aspirin). Excludes drugs with <1% of prescriptions (ticagrelor, dipyridamole, prasugrel).

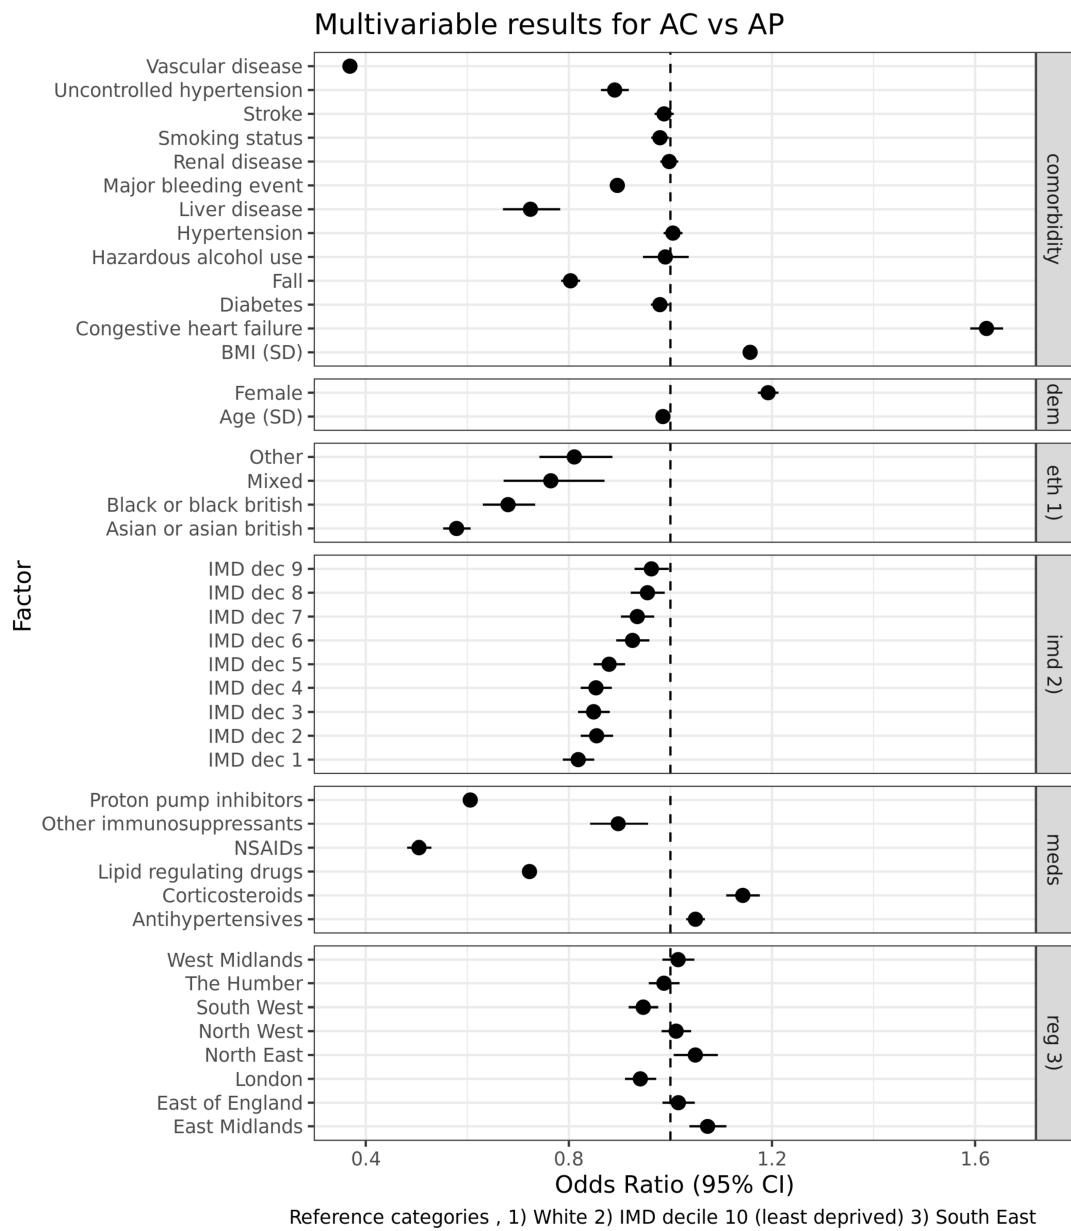

**Supplementary Figure 3: Factors associated with AC vs AP (January 1<sup>st</sup> 2020) using multivariable logistic regression**

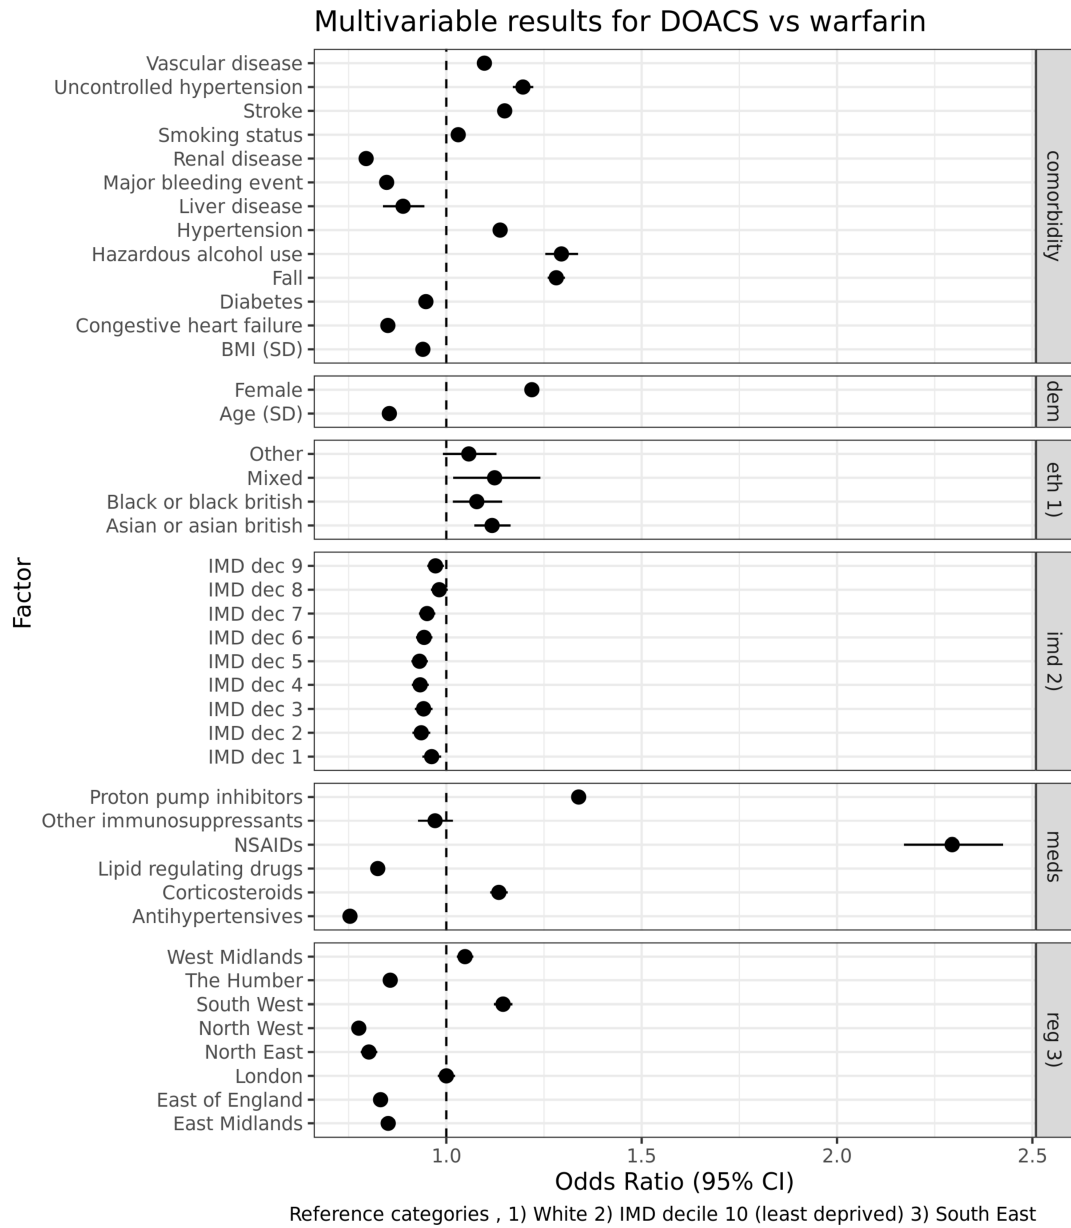

**Supplementary Figure 4: Factors associated with DOACs vs warfarin (January 1<sup>st</sup> 2020) using multivariable logistic regression**



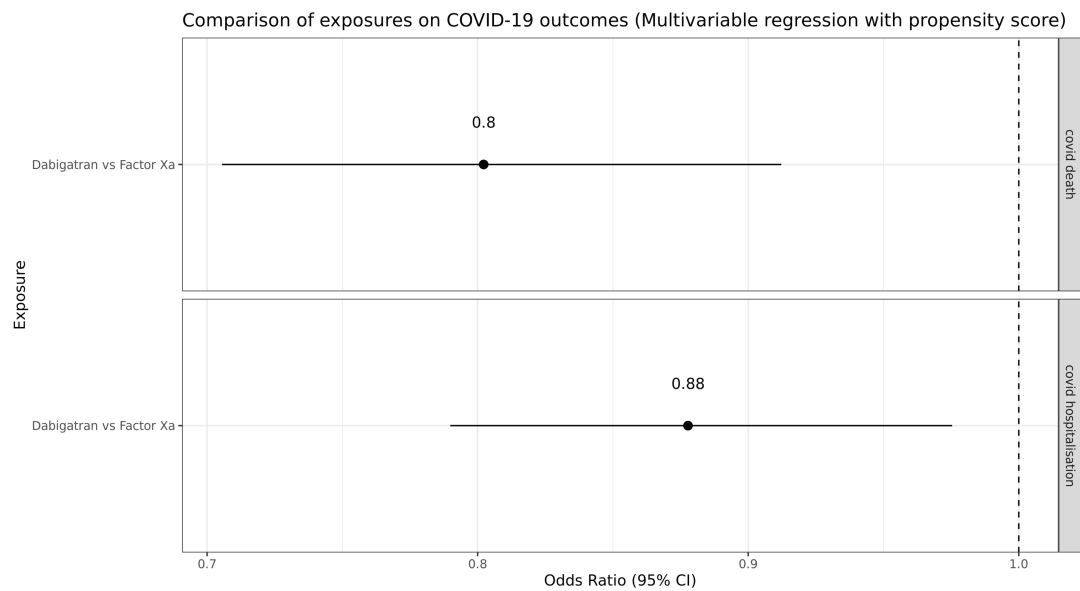

**Supplementary Figure 5: Comparison of dabigatran versus factor Xa inhibitors on COVID-19 outcomes (follow up to May 1<sup>st</sup> 2021) using propensity score adjusted multivariable logistic regression**

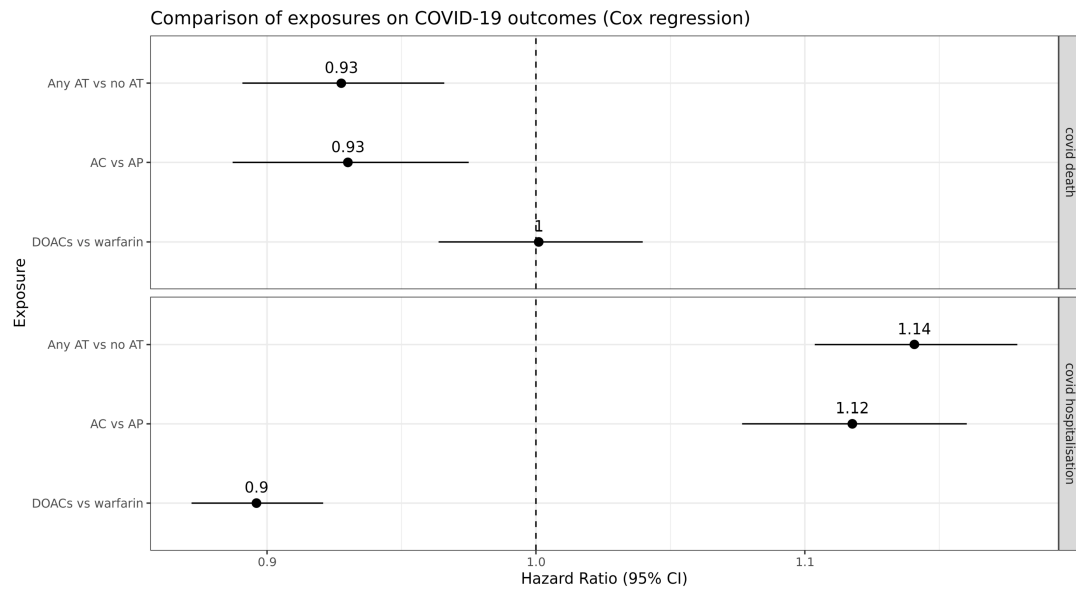

**Supplementary Figure 6: Comparison of AT medication exposures on COVID-19 outcomes (follow up to May 1<sup>st</sup> 2021) using Cox regression**

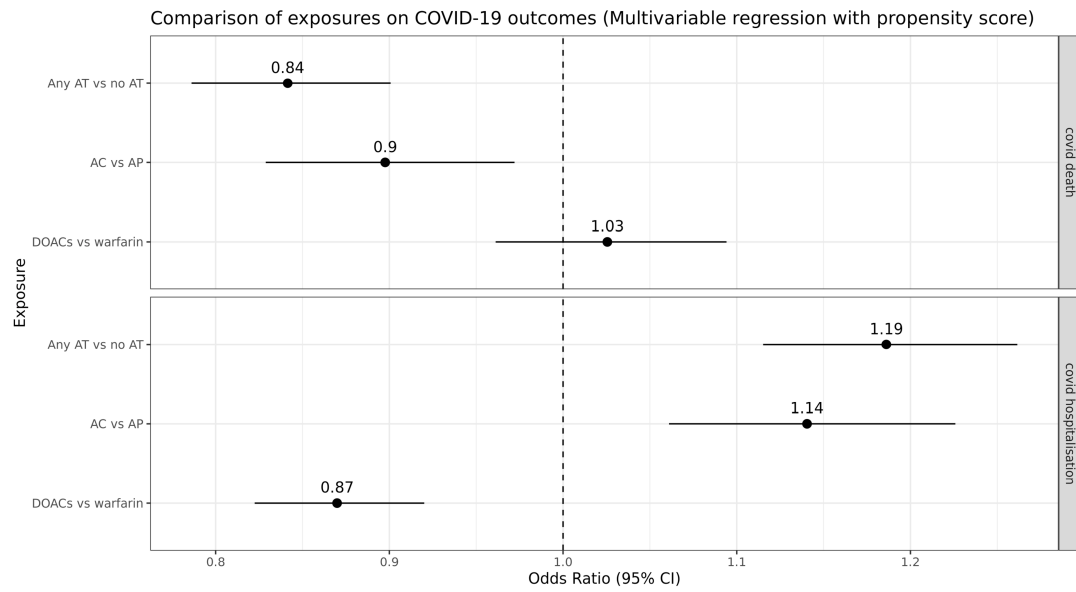

**Supplementary Figure 7: Comparison of AT medication exposures on COVID-19 outcomes (follow up to December 1<sup>st</sup> 2020) using propensity score adjusted multivariable logistic regression**

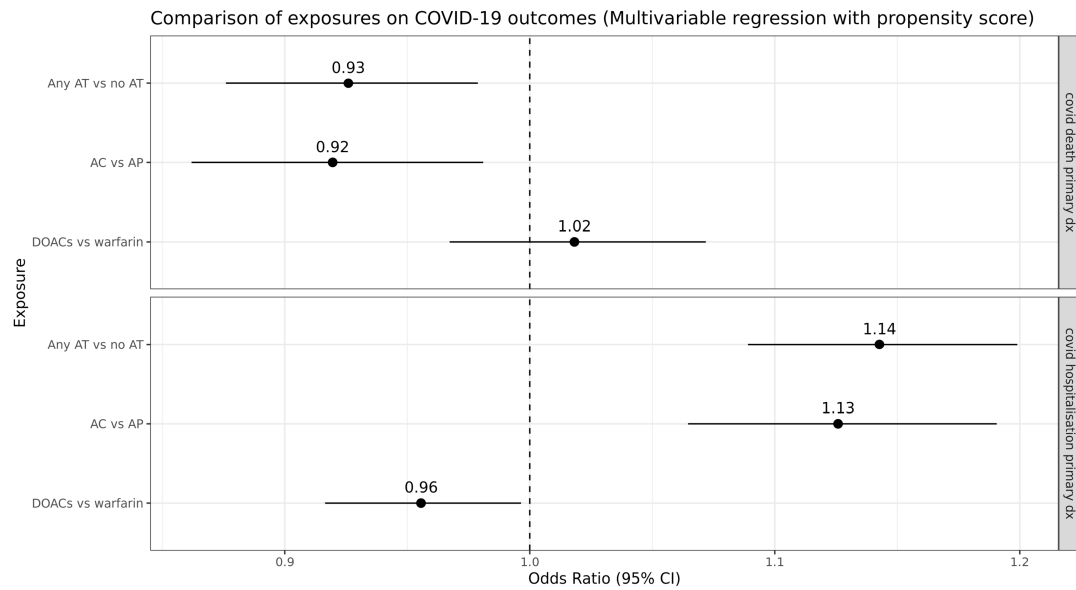

**Supplementary Figure 8: Comparison of AT medication exposures on COVID-19 hospitalisation and death defined exclusively as the primary recorded diagnosis (follow up to May 1<sup>st</sup> 2021) using propensity score adjusted multivariable logistic regression**
